# Supplementary material
Source: Springer Nature journal article supplement (https://www.springermedizin.de/resource/supplementary/13722_2011_5_MOESM1_ESM.pdf/9674886)
Supplement: MOESM1 [file 9674886]

391,111 unique outpatients  
were selected for the SHEP  
survey in 2004 or 2005

270,710 responded

225,092 provided complete  
AUDIT-C data

215,924 males

9168 females

211,267 used VA  
services during the  
2-year follow-up

9007 used VA  
services during the  
2-year follow-up
